# Supplementary material for: Induction of Antimicrobial Resistance in Escherichia coli and Non-Typhoidal Salmonella Strains after Adaptation to Disinfectant Commonly Used on Farms in Vietnam
Source: PubMed Central journal article supplement (PMC4790309; doi:10.3390/antibiotics4040480), 2015-10-30
Supplement: antibiotics-04-00480-s001.pdf [file antibiotics-04-00480-s001.pdf]

# Supplementary Material

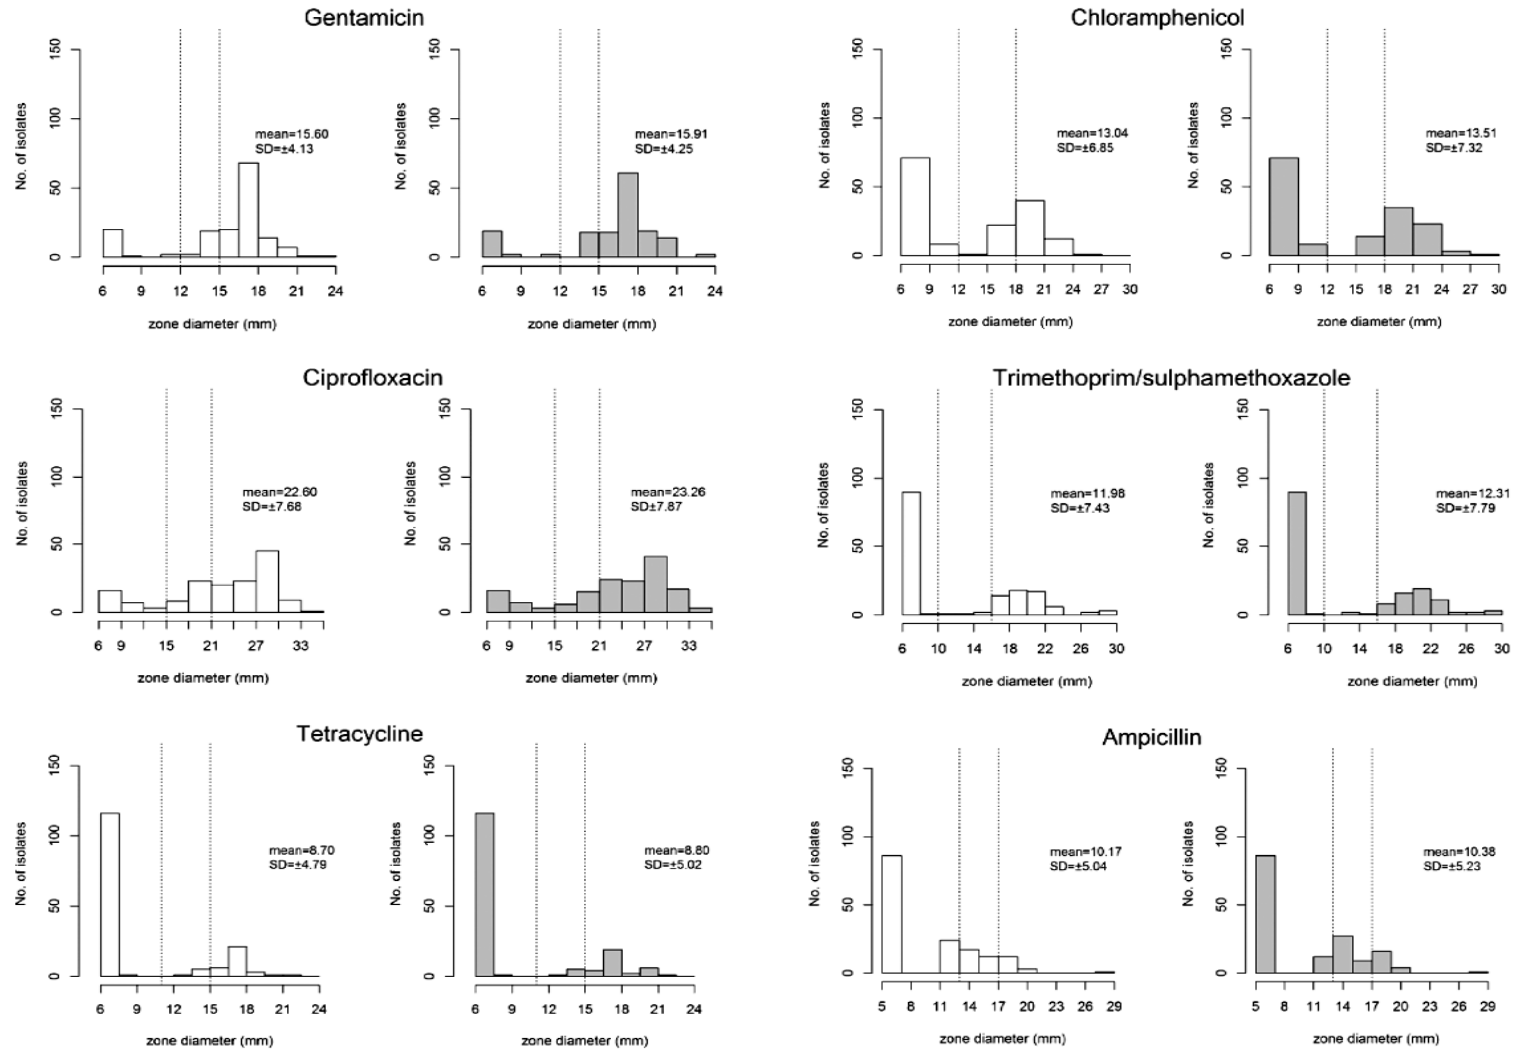

**Figure S1.** Distribution of inhibition zone diameter (mm) among 155 representative *E. coli* strains for 6 antimicrobials investigated before and after treatment with PAβN. White bars: before treatment with PAβN. Grey bars: after treatment with PAβN. Dotted lines: breakpoints for susceptible, intermediate and resistant classes based on CLSI guidelines.

**Table S1.** Most common disinfectant products used for disinfection in 208 chicken farms in Tien Giang province, Mekong Delta, Vietnam (2012–2013).

| Product | Main Components                              | Proportion of Farms Using over 12 months (%) |
|---------|----------------------------------------------|----------------------------------------------|
| A       | Benzalkonium chloride<br>Glutaraldehyde      | 74.0                                         |
| B       | DDAC, DODAC, ODDAC, ADAC *<br>Glutaraldehyde | 28.4                                         |
| C       | PVP Iodine                                   | 8.1                                          |
| D       | Potassium monopersulphate                    | 5.8                                          |
| E       | PVP Iodine<br>Glycerin                       | 4.8                                          |
| Others  |                                              | 21.6                                         |

\* DDAC: Didecyl dimethyl ammonium chloride; DODAC: Dioctyl dimethyl ammonium chloride; ODDAC: Octyl decyldimethyl ammonium chloride; ADAC: Alkyl dimethylbezy l ammonium chloride.

© 2015 by the authors; licensee MDPI, Basel, Switzerland. This article is an open access article distributed under the terms and conditions of the Creative Commons Attribution license (<http://creativecommons.org/licenses/by/4.0/>).
